1 The gene annotated by the locus tag At3g08860 encodes a  $\beta$ -alanine/L-alanine aminotransferase  
2 in *Arabidopsis thaliana*

3

4 Runining Title: At3g08860 encodes a  $\beta$ -alanine/L-alanine aminotransferase

5

6 Anutthaman Parthasarathy<sup>1</sup>, Francisco C. Savka<sup>1</sup> and André O. Hudson<sup>1\*</sup>

7 <sup>1</sup>The Thomas H. Gosnell School of Life Sciences, Rochester Institute of Technology, Rochester  
8 NY, USA

9

10

11

12

13 **Corresponding author:**

14 André O. Hudson, Ph.D.

15 Thomas H. Gosnell School of Life Sciences

16 Rochester Institute of Technology

17 85 Lomb Memorial Dr.

18 Rochester, NY 14623 U.S.A.

19 Telephone: 585-475-4259

20 FAX: 585-475-5766

21 E-mail: [aohsbi@rit.edu](mailto:aohsbi@rit.edu)

22

23

24

25 **Abstract**

26 The aminotransferase gene family in the model plant *Arabidopsis thaliana* consists of 44 genes  
27 some of which remain uncharacterized. This study elucidates the function of an uninvestigated  
28 aminotransferase annotated by the locus tag At3g08860. The cDNA was shown to functionally  
29 complement two *E. coli* mutants auxotrophic for the amino acids  $\beta$ -alanine (non-proteogenic)  
30 and L-alanine (proteogenic). The elucidation of At3g08860 activity has the potential to facilitate  
31 experiments for the optimization of plant lines involved in nitrogen utilization efficiency,  
32 response to hypoxia, osmo-protection, vitamin B5 and coenzyme A metabolism.

33

34 **Keywords:** At3g08860,  $\beta$ -alanine aminotransferase, L-alanine aminotransferase,  
35 Aminotransferase, Transaminase

36

37

38

39

40

41

42

43

44

45

46

47

48

49

50

51

## 52 INTRODUCTION

53 Aminotransferases or transaminases (EC 2.6.1.X) are pyridoxal-5'-phosphate (PLP) dependent  
54 enzymes that catalyze reversible reactions between amino acids and alpha keto acids by  
55 transferring an amine group from a donor to an acceptor. These enzymes function via a bi-  
56 molecular double displacement ping-pong mechanism where an amino acid usually serves as the  
57 amino donor and a  $\alpha$ -keto acid serves as the amino acceptor (Nelson and Cox, 2000).  
58 Aminotransferases are ubiquitous in the three kingdoms and life and are involved in a variety of  
59 metabolic pathways including amino acid metabolism, nitrogen assimilation, gluconeogenesis,  
60 and responses to a number of biotic/abiotic stresses, among other pathways (de Sousa and Sodek,  
61 2003; Liepman and Olsen, 2004; Rocha et al., 2010; McAllister et al., 2013). The genome of the  
62 model plant *Arabidopsis thaliana* contains 44 annotated genes as part of the aminotransferase  
63 gene family. In this family, 8 of the 44 genes are annotated as putative alanine aminotransferases.  
64 The loci tags are At2g13360, At4g39660, At2g38400, At1g23310, At1g70580, At1g17290,  
65 At1g72330 and At3g08860 (Liepman and Olsen, 2004; Niessen et al., 2012). In plants, the  
66 biosynthesis of non-proteogenic amino acid  $\beta$ -alanine can be anabolized from four different  
67 precursors: (1) the polyamines spermine and spermidine, (2) the nucleotide base uracil, (3)  
68 propionate and (4) L-aspartate. However, only the propionate pathway involves a  $\beta$ -alanine  
69 aminotransferase (Fig 1A). In contrast, L-alanine is synthesized by the transamination of  
70 pyruvate, where L-glutamate serve as the amino donor. This reaction is catalyzed by the enzyme  
71 alanine aminotransferase (Fig 1B).

72 In plants, alanine aminotransferases are important because they are involved in a number of  
73 important pathways. For example, it was identified in *A. thaliana* and *Oryza sativa* that two  
74 mitochondrial L-alanine/glyoxylate aminotransferases link glycoxylate oxidation to glycine  
75 formation (Niessen et al., 2012). The phenotypes of various alanine aminotransferase  
76 overexpressed in the *A. thaliana* Col-0 background and in the alanine aminotransferase  
77 (At1g17290 and At1g72330) knockouts suggests that nitrogen use efficiency (NUE) could be  
78 improved in plants by the overexpression of alanine aminotransferases (McAllister and Good,  
79 2015). Gene regulation studies of alanine aminotransferase in response to low-oxygen stress,  
80 light and nitrogen has been studied in many plants and it was shown that hypoxia induced the  
81 expression of two distinct alanine aminotransferase genes (At1g17290 and At1g72330) in *A.*  
82 *thaliana* (Miyashita et al., 2007). The function of the gene product from the locus tag At3g08860

83 has not been experimentally elucidated. Here we present data to show that the gene product of  
84 one of the putative alanine aminotransferase genes annotated by the locus tag At3g08860  
85 encodes a  $\beta$ -alanine/L-alanine aminotransferase using an *in vivo* functional complementation  
86 experiment.

## 87 **Materials and Methods**

### 88 *Plant Growth and Conditions*

89 *A. thaliana* Col 7 from the Arabidopsis Biological Resource Center (ABRC) was grown on  
90 Murashige and Skoog (MS) medium with a 16-hour light (light intensity was approximately  
91  $120 \mu\text{Em}^{-2}\text{s}^{-1}$ ) and an 8-hour dark period, with temperatures of 24°C during the light period and  
92 20°C during the dark period.

93

### 94 *RNA Isolation from Arabidopsis thaliana*

95 Total RNA was isolated from 7 day old Col 7 *A. thaliana* seedlings grown on MS medium using  
96 TriZol reagent (Life Technologies). One hundred milligrams of seedlings was ground in liquid  
97 nitrogen and homogenized in 1 mL of TriZol, followed by incubation at room temperature for  
98 two minutes. Total RNA was precipitated using 1 mL 100% (v/v) isopropanol. The RNA pellet  
99 was washed three times with 1 mL 75% (v/v) ethanol. The air-dried RNA pellet was re-  
100 suspended in 30  $\mu\text{L}$  of Diethyl Pyro carbonate (DEPC)-treated water and quantified using a  
101 NanoDrop spectrophotometer.

### 102 *cDNA Synthesis*

103 The Reverse Transcription System Kit (Promega) was used to synthesize a cDNA library  
104 following the manufacturer's protocol. One microgram of total RNA from 7 day old seedlings  
105 was used to synthesize cDNA. The reaction contained 1  $\mu\text{L}$  oligo-dT primer, 1  $\mu\text{g}$  total RNA,  
106 1  $\mu\text{L}$  of 10 mM dNTP mix, and DEPC-treated water up to 13  $\mu\text{L}$ . The mixture was incubated  
107 at 65°C for 5 minutes followed by an incubation on ice for 5 minutes.

108

### 109 *Amplification and Cloning of At3g08860 cDNA*

110 The protein full length protein encoded by At3g08860 is predicted to be 481 amino acids in  
111 length. The protein was predicted to be localized to the mitochondria using the TargetP and  
112 SUBA subcellular localization prediction tools (Emanuelsson et al., 2007; Heazlewood et al.,

113 2007). The first 93 nucleotides of the full length cDNA was predicted to encode the signal  
114 sequence that denote localization to the mitochondria. As such, the first 93 nucleotides was  
115 excluded when cloning the cDNA. The At3g08860 cDNA was amplified via PCR. The PCR (50  
116  $\mu$ L) reaction contained 1  $\mu$ L (12 pm/  $\mu$ L) each of the forward primer 5'-  
117 CACCATGTCCTCCGTCCGCGAGACCGAGACCGAA-3' and the reverse primer 5'-  
118 CTGCAGTCACATCTTGGACATGGCGTGATCCATCAC-3', 1 mM MgSO<sub>4</sub>, 0.4 mM of each  
119 of the four deoxynucleotide triphosphates, 2  $\mu$ L of cDNA library and 1 unit of platinum *Pfx*  
120 DNA polymerase (Invitrogen Corporation, Carlsbad, CA, USA). The following PCR conditions  
121 were used: 1 cycle at 94°C for 3 minutes, followed by 35 cycles of 94°C for 30 seconds, 60°C for  
122 30 seconds, and 72°C for 2 minutes and an indefinite soak of 4°C. The cDNA amplicon was  
123 ligated into the pET100/D-TOPO vector (Invitrogen Corporation, Carlsbad, CA, USA). The  
124 fidelity of the of the pET100D::At3g08860 construct was confirmed via Sanger nucleotide  
125 sequencing using T7 promoter (5'-TAATACGACTCACTATAGGG-3') and the T7 terminator  
126 (5'-TATGCTAGTTATTGCTCAG-3') primers located on the pET100/D-TOPO plasmid  
127 backbone.

### 128 *Plasmid for Functional Complementation*

129 The plasmid pBAD33::At3g08860 used for functional complementation experiments of the *E.*  
130 *coli* mutants auxotrophic for  $\beta$ -alanine (*panD*) and L-alanine (*HYE032*) was constructed by sub-  
131 cloning XbaI, PstI sites from the pET100D::At3g08860 construct into pBAD33 (Guzman et al.,  
132 1995).

### 133 *Functional Complementation*

134 Auxotrophic *E. coli* mutants for L-alanine synthesis (*HYE032*) (*avtA*::GM, *yfbQ*::KM,  
135 *yfdZ*::FRT, Ala<sup>-</sup>) was obtained from Dr. Dr. Hiroshi Yoneyama from Tohoku University  
136 (Yoneyama et al., 2011).  $\beta$ -alanine synthesis (*panD*) (F<sup>-</sup>,  $\Delta$ (*araD-araB*)567,  $\Delta$ *panD*748::kan,  
137  $\Delta$ *lacZ*4787c (::rmB-3),  $\lambda$ , *rph-1*,  $\Delta$ (*rhaD-rhaB*)568, *hsdR*514) was obtained from the Coli  
138 Genetic Stock Center (CGSC #8404) (<http://cgsc2.biology.yale.edu/>) (Baba et al., 2006). The  
139 auxotrophic strains were transformed with pBAD33 or pBAD33::At3g08860. Transformants  
140 were selected on LB media supplemented with chloramphenicol (34  $\mu$ g/mL). Colonies were then  
141 replica-plated on M9 agar plates containing M9 salts (1X), 2 mM MgSO<sub>4</sub>, 0.1 mM CaCl<sub>2</sub>, and

142 0.1% glycerol (w/v), +/- 0.2% glucose or arabinose, +/-  $\beta$ -alanine/L-alanine (10  $\mu\text{g}/\mu\text{L}$ ). In  
143 testing of the *panD* ( $\beta$ -alanine auxotroph), uracil was also required (10  $\mu\text{g}/\mu\text{L}$ ).

## 144 RESULTS AND DISCUSSION

145 Literature mostly supports the idea of alanine accumulation during hypoxia (unknown reasons)  
146 and an increase in alanine aminotransferase activity as plants return to normoxia (de Sousa and  
147 Sodek, 2003). This is perhaps a mechanism for maintenance via an increase of the nitrogen  
148 pool/skeletons, since the assimilation of inorganic nitrogen affects anaerobic tolerance  
149 (Miyashita et al., 2007). During hypoxia/anoxia in plant tissues, fermentative products such as  
150 acetaldehyde, ethanol, and lactate can accumulate where the regeneration of  $\text{NAD}^+$  by lactate  
151 dehydrogenase and alcohol dehydrogenase enhances seedling survival (Ismond et al., 2003). In  
152 fact, in *A. thaliana*, it was reported that pyruvate decarboxylase was specifically induced during  
153 oxygen limitation, but not other stresses (Kürsteiner et al., 2003). An alternative way to counter  
154 hypoxia would be through alanine aminotransferase, which could reduce the flux of carbon  
155 through lactate (which is acidic and has the potential to regulate the cytoplasmic pH) and prevent  
156 the buildup of toxic acetaldehyde (Ricoult et al., 2006). It appears that alanine fermentation  
157 primarily functions to regulate the level of pyruvate. Pyruvate is not only a known activator of  
158 the alternative oxidase (Vanlerberghe et al., 1999), but has also recently been shown to interfere  
159 with the hypoxia-induced inhibition of respiration (Gupta et al., 2009; Zabalza et al., 2009).  
160 Therefore, in order to control the rate of respiratory oxygen consumption when the oxygen  
161 availability is low, it is important to prevent pyruvate accumulation. Alanine fermentation has  
162 the potential to accomplish pyruvate accumulation with the additional advantage that alanine can  
163 accumulate to high concentrations without the detrimental side effects that go along with the  
164 lactate or ethanol fermentation pathways (Rocha et al., 2010). Alanine enters the propionate  
165 pathway of  $\beta$ -alanine synthesis via the enzyme  $\beta$ -alanine aminotransferase [EC 2.6.1.18],  
166 exchanging an amino group with malonate semialdehyde, and generating pyruvate and  $\beta$ -alanine  
167 (Fig 1A).

168

169 Functional complementation assays showed that the plasmid harboring the *At3g08860* cDNA  
170 was able to rescue both the L-alanine and  $\beta$ -alanine auxotrophs. The assay show that both *E. coli*  
171 mutants were able to grow on  $\beta$ -alanine and L-alanine free media compared to the vector only

172 control, which needed both amino acids to grow (Fig 2A and 2B). Interestingly, in the *panD*  
173 background, the cDNA rescued growth under repressible conditions (plus glucose) and not under  
174 inducible conditions (plus arabinose) (Fig 2A) whereas the opposite is true in the *HYE032*  
175 background (Fig 2B). This result suggests that the enzyme is probably involved in  $\beta$ -alanine  
176 metabolism and not L-alanine metabolism. The results of the assays demonstrated a definitive  
177 preference of enzymatic activity towards the synthesis of  $\beta$ -alanine suggesting that At3g08860 is  
178 maybe involved in osmo-protection, formation of vitamin B5 and coenzyme A, given the fact  
179 that  $\beta$ -alanine is involved in these pathways.

180

181 Studies investigating genes (across a wide array of metabolic/cellular processes) have identified  
182 the *At3g08860* locus as responsive to changes in light, which indirectly could affect  
183 carbon/oxygen availability/concentration (Thum et al., 2008). Previous work suggested that the  
184 protein is localized in either the mitochondria or the peroxisome (Niessen et al, 2012). The  
185 visualization of cellular localization using GFP-tagged transcripts was unsuccessful, however  
186 based on its sequence; this aminotransferase is believed to be localized in the mitochondria. This  
187 suggests an involvement in photorespiration, particularly as it relates to glycine synthesis  
188 (following glycolate oxidation to form glyoxylate) as detailed by Niessen et al., 2007, who also  
189 demonstrated that alanine:glyoxylate aminotransferase activity was the only aminotransferase  
190 activity detected within the mitochondria (Niessen et al., 2012). They also demonstrated that  
191 alanine degradation resulted in an increase in CO<sub>2</sub> release following addition of alanine to  
192 mitochondrial extract, implying that alanine degradation increased photorespiratory activity  
193 (Niessen et al., 2007). Further suggesting the involvement of At3g08860 in photorespiration  
194 based on the gene expression in hydathode tissue (Wenzel et al., 2008).

195

## 196 **ACKNOWLEDGEMENTS**

197 We thank Dr. Hiroshi Yoneyama from Tohoku University for providing the *E. coli* *HYE032*  
198 mutant. We would like to acknowledge the College of Science and the Thomas H. Gosnell  
199 School of Life Sciences at the Rochester Institute of Technology for ongoing support.

## 200 **COMPETING INTERESTS**

201 The authors declare no competing or financial interests.

202 **FUNDING**

203 This research was supported by a United States National Science Foundation (NSF) award  
204 (MCB-#1120541) to AOH.

205 **REFERENCES**

206 **Baba, T., Ara, T., Hasegawa, M., Takai, Y., Okumura, Y., Baba, et al.** (2006). Construction of  
207 *Escherichia coli* K-12 in-frame, single-gene knockout mutants: the Keio collection. *Mol Syst Biol.* **2**,  
208 2006.0008.

209  
210 **de Sousa, C. A. F. and Sodek, L.** (2003). Alanine metabolism and alanine aminotransferase  
211 activity in soybean (*Glycine max*) during hypoxia of the root system and subsequent return to  
212 normoxia. *Environ. Exp. Bot.* **50**, 1-8.

213  
214 **Emanuelsson, O., Brunak, S., von Heijne, G., and Nielsen, H.** (2007). Locating proteins in the  
215 cell using TargetP, SignalP and related tools. *Nat. Protoc.* **2(4)**, 953-971.

216  
217 **Heazlewood, J. L., Verboom, R. E., Tonti-Filippini, J., Small, I. and Millar, A. H.** (2007). SUBA:  
218 the Arabidopsis subcellular database. *Nucleic Acids Res.* **5**, D213-D218.

219 **Gupta, K. J., Zabalza, A., and van Dongen, J. T.** (2009). Regulation of respiration when the  
220 oxygen availability changes. *Physiol. Plant* **137(4)**, 383-391.

221  
222 **Guzman, L. M., Belin, D., Carson, M. J., and Beckwith, J.** (1995). Tight regulation, modulation,  
223 and high-level expression by vectors containing the arabinose PBAD promoter. *J. Bacteriol.*  
224 **177(14)**, 4121-4130.

225  
226 **Ismond, K. P., Dolferus, R., de Pauw, M., Dennis, E. S., and Good, A. G.** (2003). Enhanced low  
227 oxygen survival in Arabidopsis through increased metabolic flux in the fermentative pathway.  
228 *Plant Physiol.* **132(3)**, 1292-1302.

229  
230 **Kürsteiner, O., Dupuis, I., and Kuhlemeier, C.** (2003). The pyruvate decarboxylase1 gene of  
231 Arabidopsis is required during anoxia but not other environmental stresses. *Plant Physiol.*  
232 **132(2)**, 968-978.

233  
234 **Liepman, A. H. and Olsen, L. J.** (2004). Genomic analysis of aminotransferases in *Arabidopsis*  
235 *thaliana*. *Crit. Rev. Plant Sci.* **23(1)**, 73-89.

236  
237 **McAllister, C. H., Facette, M., Holt, A. and Good, A. G.** (2013). Analysis of the enzymatic  
238 properties of a broad family of alanine aminotransferases. *PLoS One* **8(2)**, e55032.

239  
240 **McAllister, C. H. and Good, A. G.** (2015). Alanine aminotransferase variants conferring diverse  
241 NUE phenotypes in *Arabidopsis thaliana*. *PLoS One* **10(4)**, e0121830.



242  
243 **Miyashita, Y., Dolferus, R., Ismond, K. P., and Good, A. G.** (2007). Alanine aminotransferase  
244 catalyses the breakdown of alanine after hypoxia in *Arabidopsis thaliana*. *Plant J* **49(6)**, 1108-1121.  
245  
246 **Nelson, D., and Cox, M.** (2000). *Lehninger, Principles of Biochemistry*. New York, Worth  
247 Publishing.  
248 **Niessen, M., Krause, K., Horst, I., Staebler, N., Klaus, S., Gaertner, S., et al.** (2012). Two  
249 alanine aminotransferases link mitochondrial glycolate oxidation to the major photorespiratory  
250 pathway in *Arabidopsis* and rice. *J. Exp. Bot.* **63(7)**, 2705-2716.  
251  
252 **Niessen, M., Thiruveedhi, K., Rosenkranz, R., Kebeish, R., Hirsch, H. J., Kreuzaler F., et al.**  
253 (2007). Mitochondrial glycolate oxidation contributes to photorespiration in higher plants. *J.*  
254 *Exp. Bot.* **58(10)**, 2709-2715.  
255  
256 **Ricoult, C., Echeverria, L. O., Cliquet, J. B. and Limami, A. M.** (2006). Characterization of  
257 alanine aminotransferase (AlaAT) multigene family and hypoxic response in young seedlings of  
258 the model legume *Medicago truncatula*. *J. Exp. Bot.* **57(12)**, 3079-3089.  
259  
260 **Rocha, M., Licausi, F., Araújo, W. L., Nunes-Nesi, A., Sodek, L., Fernie, A. R., et al.** (2010).  
261 Glycolysis and the tricarboxylic acid cycle are linked by alanine aminotransferase during  
262 hypoxia induced by waterlogging of *Lotus japonicus*. *Plant Physiol.* **152(3)**, 1501-1513.  
263  
264 **Thum, K. E., Shin, M. J., Gutiérrez, R. A., Mukherjee, I., Katari, M. S., Nero, D., et al.** (2008).  
265 An integrated genetic, genomic and systems approach defines gene networks regulated by the  
266 interaction of light and carbon signaling pathways in *Arabidopsis*. *BMC Syst. Biol.* **2**, 31.  
267  
268 **Vanlerberghe, G. C., Yip, J. Y. and Parsons, H. L.** (1999). In organello and in vivo evidence of  
269 the importance of the regulatory sulfhydryl/disulfide system and pyruvate for alternative  
270 oxidase activity in tobacco. *Plant Physiol.* **121(3)**, 793-803.  
271  
272 **Wenzel, C. L., Hester, Q. and Mattsson, J.** (2008). Identification of genes expressed in vascular  
273 tissues using NPA-induced vascular overgrowth in *Arabidopsis*. *Plant Cell Physiol.* **49(3)**, 457-  
274 468.  
275  
276 **Yoneyama, H., Hori, H., Lim, S. J., Murata, T., Ando, T., Isogai, E., et al.** (2011). Isolation of a  
277 mutant auxotrophic for L-alanine and identification of three major aminotransferases that  
278 synthesize L-alanine in *Escherichia coli*. *Biosci. Biotechnol. Biochem.* **75(5)**, 930-938.  
279  
280 **Zabalza, A., van Dongen, J. T., Froehlich, A., Oliver, S. N., Faix, B., Gupta, K. J., et al.** (2009).  
281 Regulation of respiration and fermentation to control the plant internal oxygen concentration.  
282 *Plant Physiol.* **149(2)**, 1087-1098.  
283

284

285

286

287

288 **Fig 1.** (A)  $\beta$ -alanine synthesis from the propionate pathway.  $\beta$ -Alanine aminotransferase  
289 catalyzes the synthesis of  $\beta$ -alanine and pyruvate using L-alanine as the amino donor and  
290 malonate semialdehyde as the amino acceptor. (B) Pyruvate is transaminated by alanine  
291 aminotransferase to synthesize L-alanine using L-glutamate as the amino donor. The EC  
292 numbers of the enzymes shown in brackets correspond to the following enzymes: 6.2.1.17 =  
293 propionyl-CoA synthetase, 1.3.99.3 = acyl-CoA dehydrogenase, 4.2.1.116 = 3-  
294 hydroxypropionyl-CoA dehydratase, 3.2.1.4 = 3-hydroxyisobutyryl-CoA hydrolase, 1.1.1.59 =  
295 3-hydroxypropionate dehydrogenase, 2.6.1.18 =  $\beta$ -alanine-pyruvate aminotransferase and 2.6.1.2  
296 = alanine aminotransferase. The yellow arrows indicate the reactions catalyzed by  $\beta$ -alanine and  
297 L-alanine aminotransferase.

298

299 **Fig 2.** Functional complementation assay. (A) Functional complementation of the *panD* *E. coli*  
300 mutant, which is auxotrophic for  $\beta$ -alanine. (B) Functional complementation of the *E. coli*  
301 *HYE032* mutant, which is auxotrophic for L-alanine. The plasmids used were pBAD33 and  
302 pBAD33::At3g08860. Transformants harboring pBAD33 or pBAD33::At3g08860 were grown  
303 to an OD of 1.0 measured at 600nm. The strains were serially diluted to  $10^{-1}$ ,  $10^{-2}$ ,  $10^{-3}$ , and  $10^{-4}$   
304 using 0.85% (w/v) saline. Five  $\mu$ L was replica plated on M9 medium with or without  $\beta$ -alanine  
305 or L-alanine supplemented with 0.2% (w/v) arabinose or glucose.

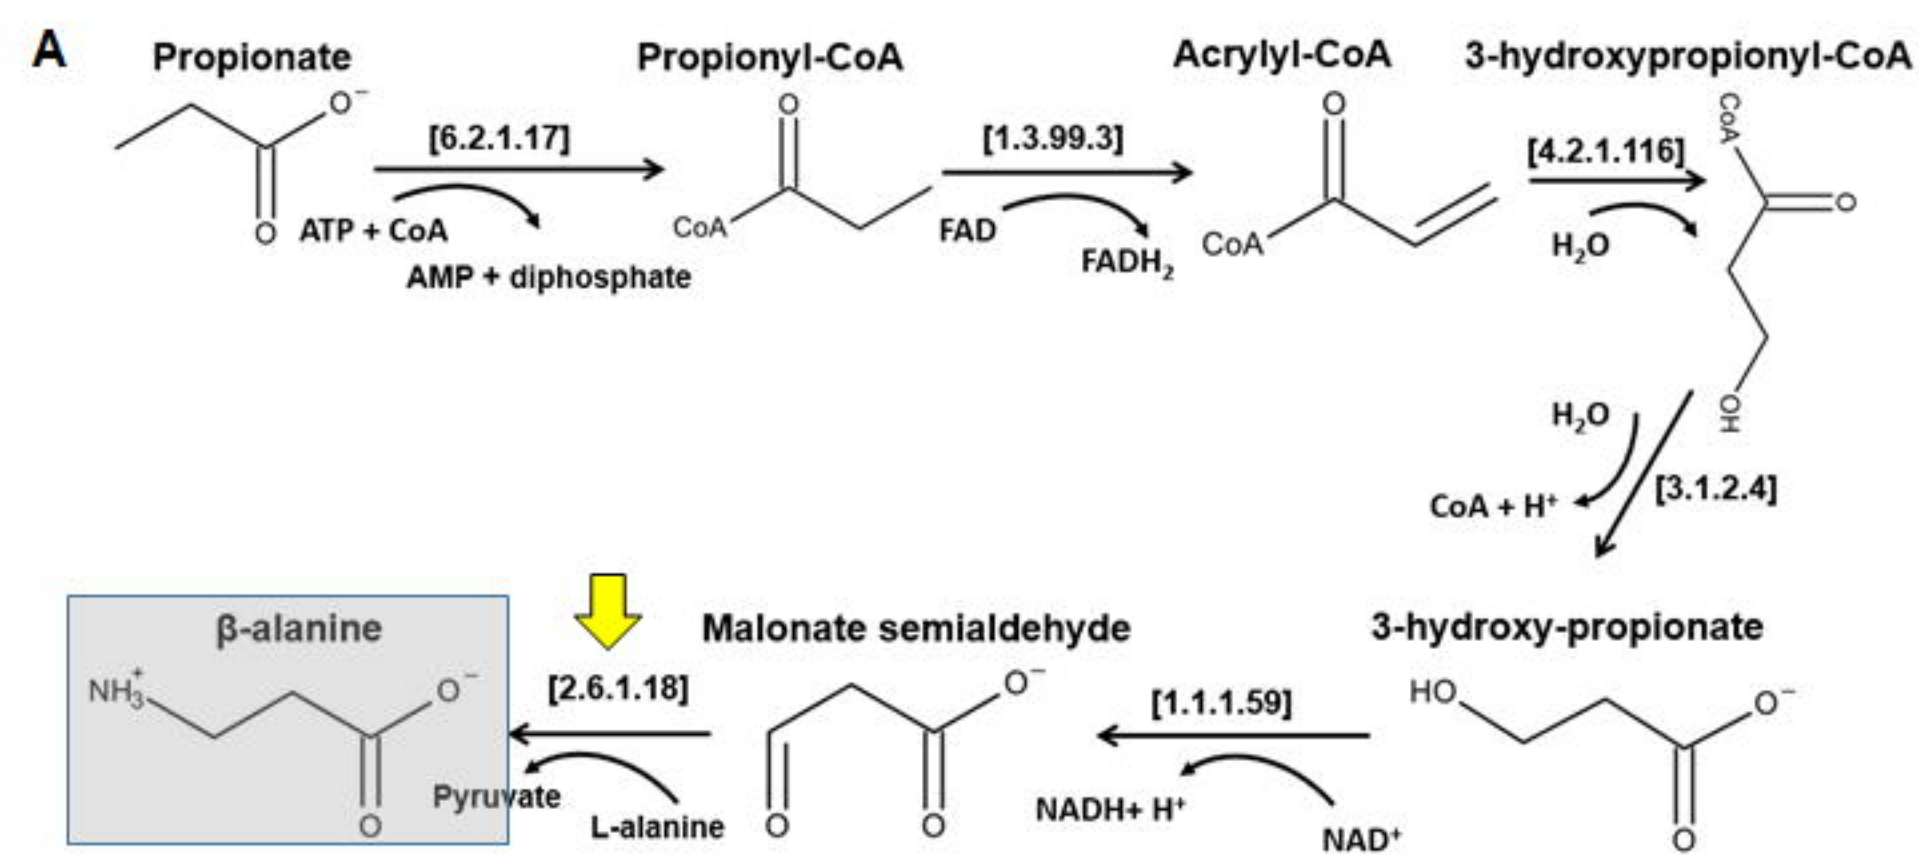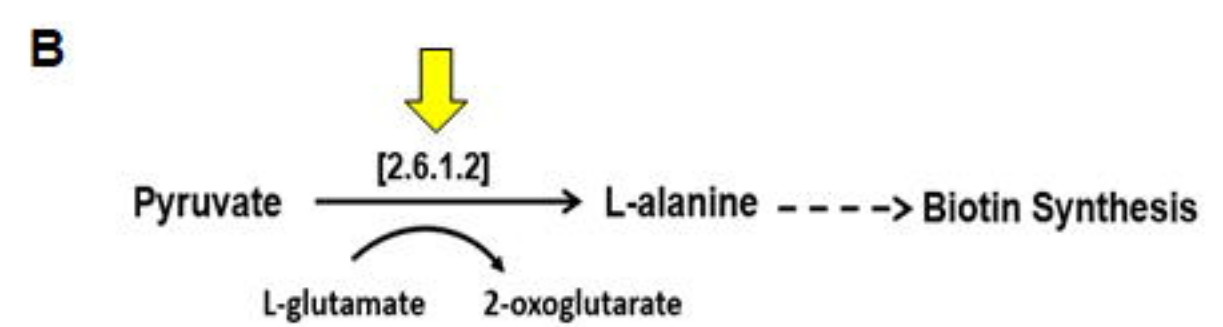

**A**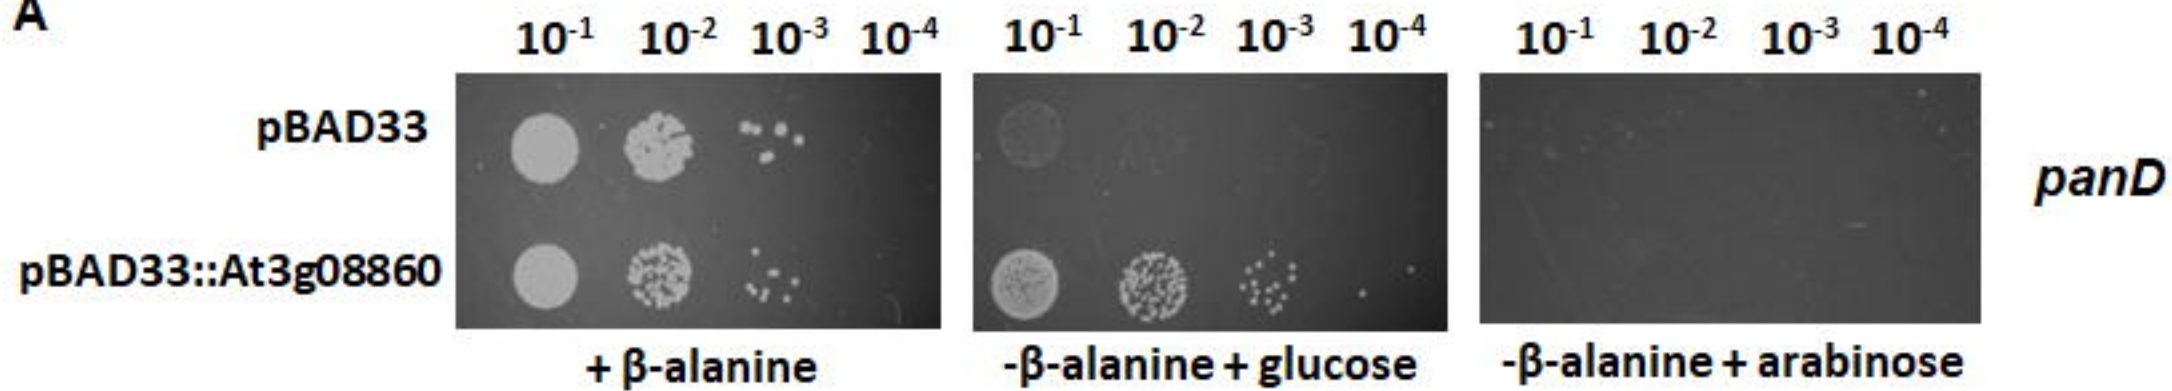**B**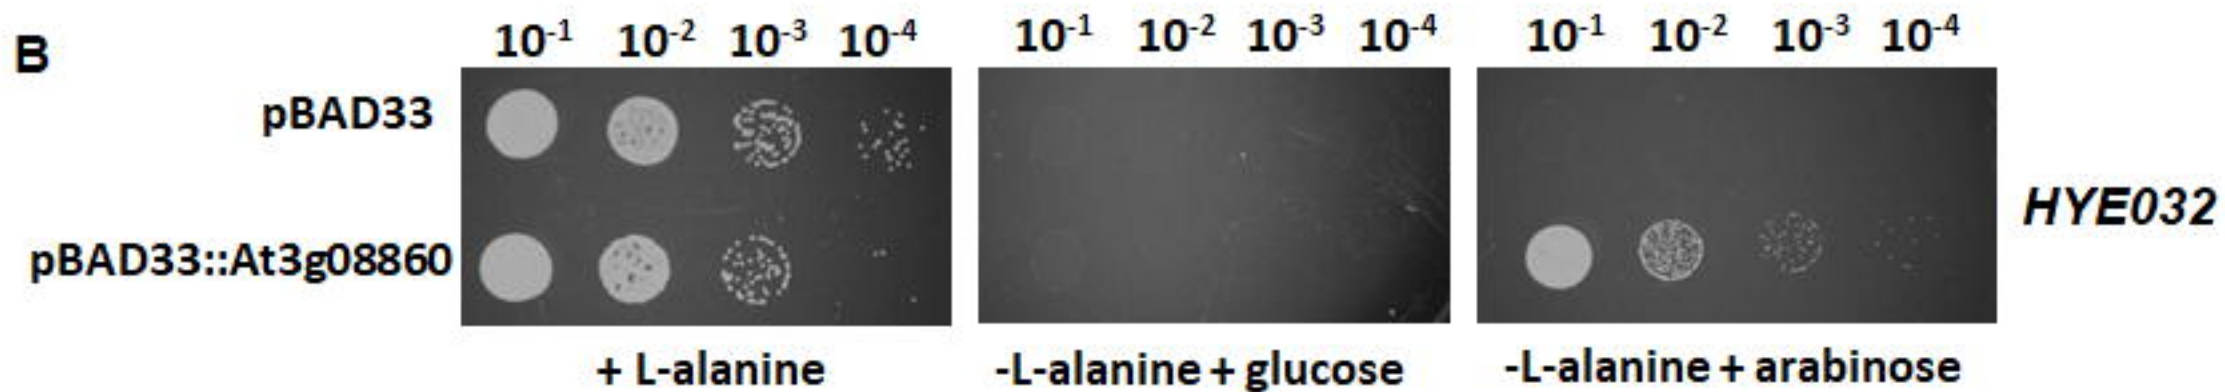

Source: https://www.biorxiv.org/content/10.1101/576041v1.full.pdf
